# Supplementary material
Source: Springer Nature journal article supplement (https://www.springermedizin.de/resource/supplementary/12936_2010_1606_MOESM4_ESM.pdf/9541902)
Supplement: MOESM4 [file 9541902]

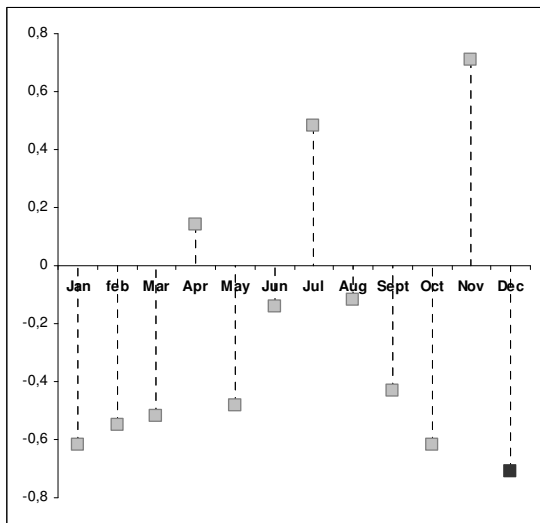

a) Minimum temperature

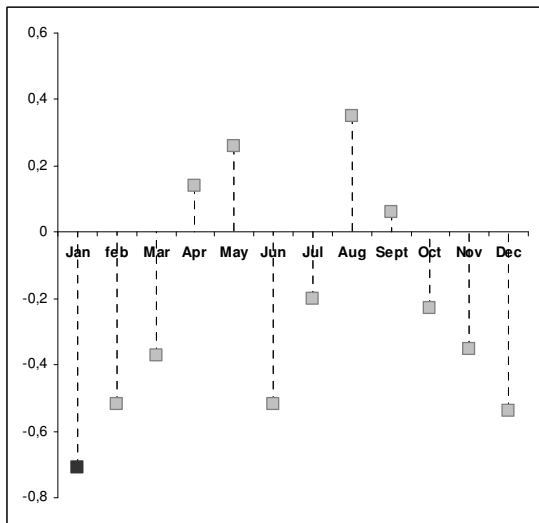

b) Maximum temperature (lag 2)

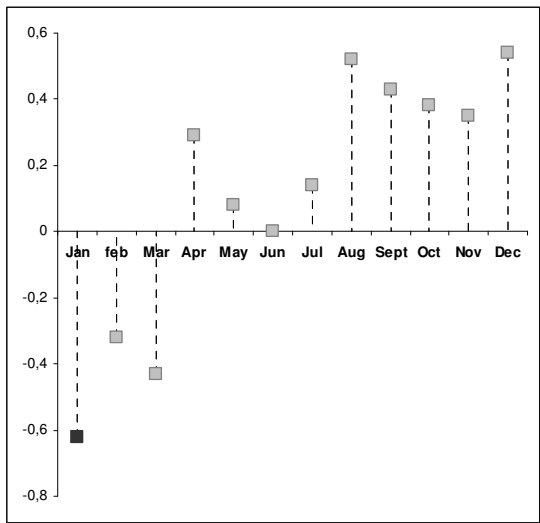

c) Maximum temperature (lag 9)

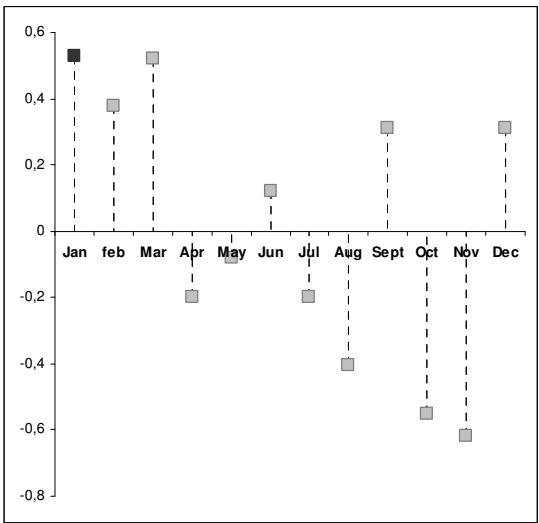

d) Minimum level of River (lag 12)
